# Supplementary material
Source: PubMed Central journal article supplement (PMC3812070)
Supplement: NIHMS431579-supplement-1.pdf [file NIHMS431579-supplement-1.pdf]

**Table S1. Nuclear-Encoded Mitochondrial mRNAs/Proteins Showing Discordance during PGC-1 $\alpha$  Overexpression in C2C12****Mouse Myotubes, Related to Figure 1**

| Entrez Gene | Gene Symbol   | SILAC<br>PGC/GFP | MicroarrayPGC<br>/GFP | Mircoarray/SIL<br>AC | OxPhos | Iron-Binding |
|-------------|---------------|------------------|-----------------------|----------------------|--------|--------------|
| 73724       | Mcee          | 0.35             | 2.72                  | 7.71                 | 0      | 0            |
| 67308       | Mrpl46        | 0.96             | 2.84                  | 2.96                 | 0      | 0            |
| 217707      | Coq6          | 0.89             | 2.56                  | 2.87                 | 0      | 0            |
| 232536      | Mrps35        | 0.99             | 2.72                  | 2.76                 | 0      | 0            |
| 108841      | Rdh13         | 0.93             | 2.38                  | 2.54                 | 0      | 0            |
| 118451      | Mrps2         | 0.99             | 2.44                  | 2.47                 | 0      | 0            |
| 27395       | Mrpl15        | 0.91             | 2.22                  | 2.43                 | 0      | 0            |
| 213012      | Abhd10        | 0.88             | 2.14                  | 2.42                 | 0      | 0            |
| 20917       | Suclg2        | 0.52             | 1.15                  | 2.21                 | 0      | 0            |
| 68971       | 1500001M20Rik | 0.72             | 1.58                  | 2.19                 | 0      | 0            |
| 57312       | Mrps31        | 0.60             | 1.30                  | 2.16                 | 0      | 0            |
| 67264       | Ndufb8        | 0.81             | 1.72                  | 2.14                 | 1      | 0            |
| 407785      | Ndufs6        | 0.82             | 1.69                  | 2.06                 | 1      | 0            |
| 228026      | Pdk1          | 0.94             | 1.92                  | 2.04                 | 0      | 0            |
| 66821       | Bcs1l         | 0.96             | 1.94                  | 2.03                 | 0      | 0            |
| 319518      | 4930402E16Rik | 0.99             | 2.01                  | 2.03                 | 0      | 0            |
| 66525       | Timm50        | 0.90             | 1.81                  | 2.00                 | 0      | 0            |
| 66218       | Ndufb9        | 0.79             | 1.55                  | 1.98                 | 1      | 0            |
| 66445       | Cycl          | 0.99             | 1.91                  | 1.93                 | 1      | 1            |
| 79464       | Lias          | 0.83             | 1.59                  | 1.93                 | 0      | 1            |
| 66163       | Mrpl4         | 1.00             | 1.92                  | 1.93                 | 0      | 0            |
| 12894       | Cpt1a         | 0.98             | 1.88                  | 1.91                 | 0      | 0            |
| 227197      | Ndufs1        | 0.96             | 1.84                  | 1.91                 | 1      | 1            |
| 59054       | Mrps30        | 0.99             | 1.89                  | 1.91                 | 0      | 0            |
| 73694       | 2410091C18Rik | 0.66             | 1.24                  | 1.89                 | 0      | 0            |
| 56280       | Mrpl37        | 0.93             | 1.72                  | 1.85                 | 0      | 0            |
| 110821      | Pcca          | 0.74             | 1.36                  | 1.85                 | 0      | 0            |
| 60441       | Mrpl38        | 0.98             | 1.82                  | 1.84                 | 0      | 0            |
| 104776      | Aldh6a1       | 0.61             | 1.09                  | 1.80                 | 0      | 0            |

|        |               |      |      |      |   |   |
|--------|---------------|------|------|------|---|---|
| 66399  | Tsfm          | 0.95 | 1.67 | 1.76 | 0 | 0 |
| 68537  | Mrpl3         | 0.98 | 1.70 | 1.74 | 0 | 0 |
| 94061  | Mrpl1         | 1.00 | 1.74 | 1.74 | 0 | 0 |
| 12896  | Cpt2          | 0.98 | 1.68 | 1.72 | 0 | 0 |
| 12257  | Bzrp          | 0.85 | 1.46 | 1.71 | 0 | 0 |
| 66916  | Ndufb7        | 0.96 | 1.63 | 1.70 | 1 | 0 |
| 229211 | Acad9         | 0.85 | 1.45 | 1.69 | 0 | 0 |
| 216821 | Tmem11        | 0.90 | 1.52 | 1.69 | 0 | 0 |
| 230935 | Dnajc11       | 0.93 | 1.55 | 1.66 | 0 | 0 |
| 217830 | 9030617003Rik | 0.80 | 1.32 | 1.64 | 0 | 0 |
| 70047  | Trnt1         | 0.99 | 1.58 | 1.60 | 0 | 0 |
| 52538  | Acaa2         | 0.94 | 1.51 | 1.60 | 0 | 0 |
| 76784  | Mtif2         | 0.99 | 1.56 | 1.58 | 0 | 0 |
| 226646 | Ndufs2        | 0.96 | 1.52 | 1.58 | 1 | 1 |
| 66701  | Spryd4        | 0.91 | 1.43 | 1.57 | 0 | 0 |
| 72039  | Mccc1         | 0.79 | 1.24 | 1.57 | 0 | 0 |
| 99045  | Mrps26        | 0.84 | 1.29 | 1.54 | 0 | 0 |
| 68572  | Ict1          | 0.97 | 1.49 | 1.54 | 0 | 0 |
| 69029  | 1500032L24Rik | 0.86 | 1.32 | 1.54 | 0 | 0 |
| 94063  | Mrpl16        | 0.78 | 1.19 | 1.53 | 0 | 0 |
| 66414  | Ndufa12       | 0.92 | 1.40 | 1.52 | 1 | 0 |
| 69527  | Mrps9         | 0.98 | 1.49 | 1.51 | 0 | 0 |
| 68165  | B230118G17Rik | 0.88 | 1.33 | 1.51 | 0 | 1 |
| 108147 | Atic          | 1.03 | 0.69 | 0.67 | 0 | 0 |
| 28200  | Dhrs4         | 1.08 | 0.72 | 0.67 | 0 | 0 |
| 216188 | Aldh1l2       | 1.06 | 0.70 | 0.66 | 0 | 0 |
| 14467  | Gbas          | 1.15 | 0.74 | 0.64 | 0 | 0 |
| 56748  | Hirip5        | 1.32 | 0.83 | 0.63 | 0 | 1 |
| 20655  | Sod1          | 1.03 | 0.63 | 0.62 | 0 | 0 |

Differentiated myotubes were analyzed after 3 days of PGC-1 $\alpha$  overexpression. Top 58 nuclear-encoded mitochondrial

mRNAs/proteins showing discordance in expression fold change (PGC-1 $\alpha$ /GFP) are displayed. Oxidative phosphorylation (OxPhos) and

iron-binding proteins are indicated. SILAC, stable isotope labeling by amino acids in cell culture; PGC, peroxisome proliferator-activated receptor gamma, coactivator 1 alpha; GFP, green fluorescent protein.

**Table S2. Primary Antibodies Used for Immunoblotting**

| Antigen             | Host   | Dilution | Supplier                  |
|---------------------|--------|----------|---------------------------|
| $\beta$ -actin      | Mouse  | 1:10,000 | Sigma-Aldrich             |
| Calreticulin        | Rabbit | 1:1,000  | Cell Signaling Technology |
| Cl subunit 8kDa     | Mouse  | 1:1,000  | MitoSciences              |
| COXIV               | Mouse  | 1:2,000  | MitoSciences              |
| Cytochrome <i>c</i> | Mouse  | 1:8,000  | MitoSciences              |
| GFP                 | Mouse  | 1:1,000  | Santa Cruz Biotechnology  |
| Lamin A             | Mouse  | 1:500    | Abcam                     |
| NDUFS3              | Mouse  | 1:1,000  | MitoSciences              |
| PGC-1 $\beta$       | Rabbit | 1:500    | Sigma-Aldrich             |
| TFRC                | Mouse  | 1:1,000  | Invitrogen                |
| VDAC                | Rabbit | 1:8,000  | Abcam                     |
